# Supplementary material
Source: PubMed Central journal article supplement (PMC3057650)

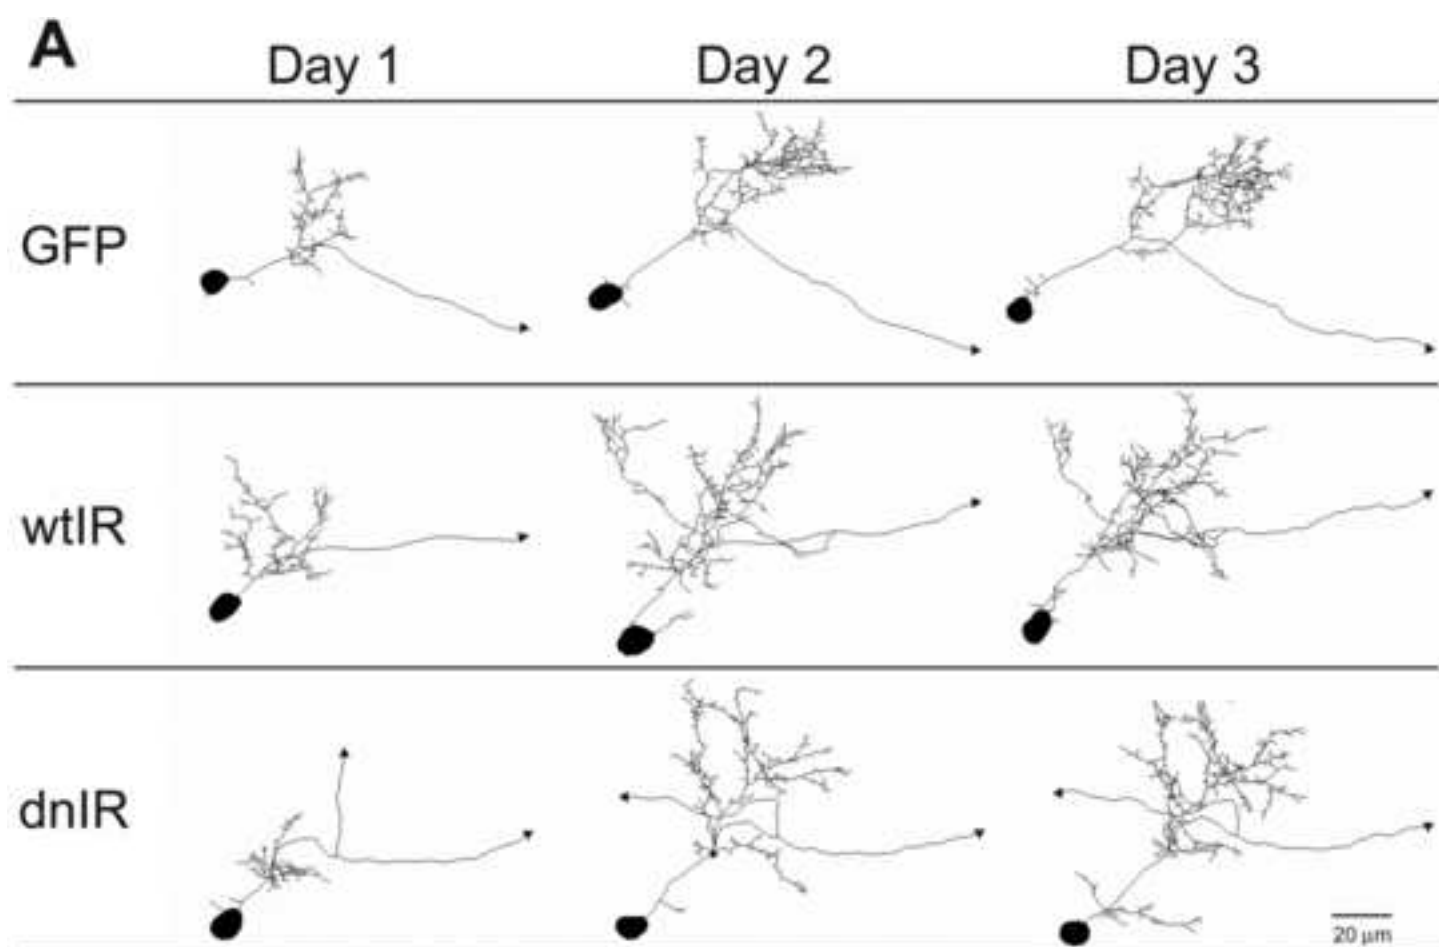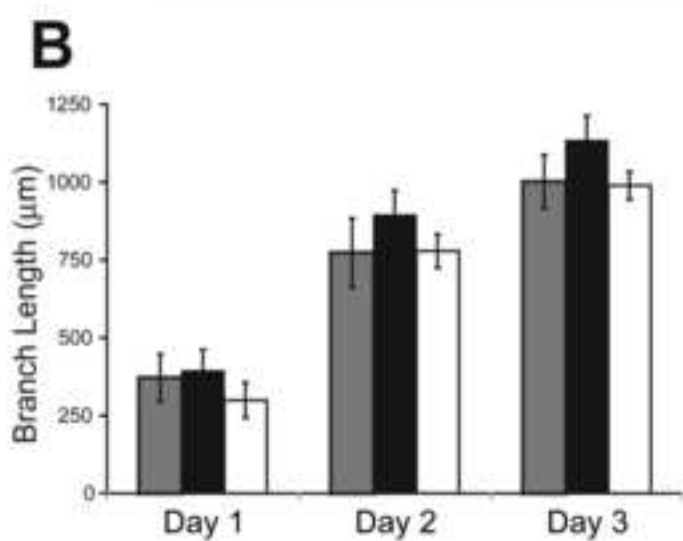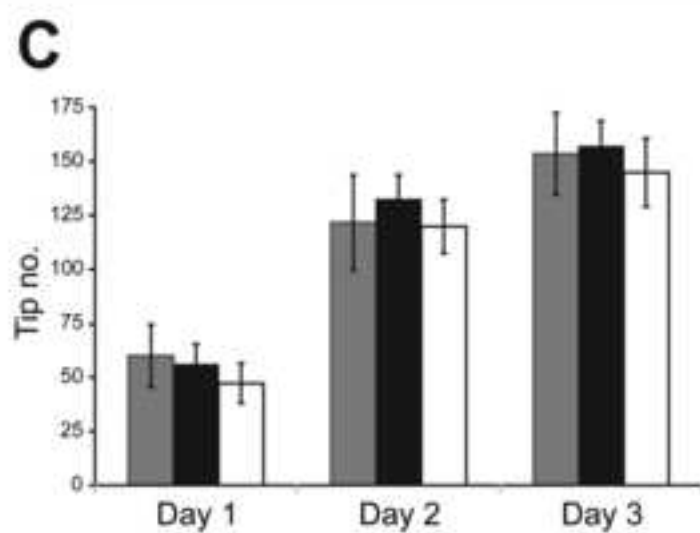

Supplement: NIHMS267069-supplement-01.pdf [file NIHMS267069-supplement-01.pdf]
